# Supplementary material for: Exploring mosquito virome dynamics within São Paulo Zoo: insights into mosquito-virus-environment interactions
Source: Front Cell Infect Microbiol. 2025 Jan 10;14:1496126. doi: 10.3389/fcimb.2024.1496126 (PMC11757883; doi:10.3389/fcimb.2024.1496126)
Supplement: Supplementary file 3 [file Table3.xlsx]

## Sheet: dados_virus_by_mosquito
Aedes	Anopheles	Culex
Atrato Virga-like virus 6	Culex Iflavi-like virus 4	Culex Bunya-like virus
Atrato Virga-like virus 7	Phylloscopus proregulus Brevihamaparvovirus	Culex Iflavi-like virus 4
Bawangfen virus	Soybean thrips tombus-like virus 2	Culex mosquito virus 1
Culex Bunya-like virus	Arurhavirus inhangapi	Enontekio sobemovirus
Culex Iflavi-like virus 4	Atrato Partiti-like virus 2	Frankliniella occidentalis associated sobemo-like virus 2
Culex mosquito virus 1	Chaq-like virus	Furrundu phlebovirus
Culex pseudovishnui bunya-like virus	Hangzhou rhabdovirus 5	Grapevine Red Globe virus
Culex tritaeniorhynchus partitivirus	Hapavirus parry	Microviridae sp.
Drosophila biauraria male killing partitivirus 1	Khandagaity Melophagus ifla-like virus	Partitiviridae sp.
Enontekio sobemovirus	Mekrijarvi iflavirus	Phylloscopus proregulus Brevihamaparvovirus
Frankliniella occidentalis associated sobemo-like virus 2	Merhavirus merida	Pyongtaek Culex Macula-like virus
Furrundu phlebovirus	Microviridae sp. ctjwa4	Riboviria sp.
Grapevine Red Globe virus	Nodaviridae sp.	Scaphoideus titanus sobemo-like virus 2
Hanko totivirus 10	Picornavirales sp.	Soybean thrips tombus-like virus 2
Hanko totivirus 7	Sanxia Water Strider Virus 5	Tama virus
Ilomantsi partiti-like virus 2	Soufli partiti-like virus	Tartas insect-associated virus
Inopus flavus jingmenvirus 1	Vesiculovirus malpais	Atrato Partiti-like virus 2
Kalajoki phenui-like virus 2		Chaq-like virus
Kuusamo partiti-like virus		Merhavirus merida
Kwi virus		Microviridae sp. ctjwa4
Lampyris noctiluca errantivirus 1		Nodaviridae sp.
Marafivirus avenae		Aedes Ifla-like virus
Marafivirus nucipersicae		Aedes japonicus totivirus 1
Microviridae sp.		Aedes pseudoscutellaris reovirus
Mobuvirus narangueense		Aedes sobemo-like virus
Nefer virus		Alphabaculovirus chrychalcites
Partitiviridae sp.		Alphachrysovirus shuangaoense
Phylloscopus proregulus Brevihamaparvovirus		Alphamesonivirus 1
Pyongtaek Culex Bunyavirus		Alphanudivirus alterdromelanogasteris
Pyongtaek Culex Macula-like virus		Alphanudivirus droinnubilae
Riboviria sp.		Alphanudivirus dromelanogasteris
Salari virus		Alphanudivirus oryrhinocerotis
Salarivirus Mos8CM0		Alphanudivirus quartudromelanogasteris
Scaphoideus titanus sobemo-like virus 2		Alphanudivirus tertidromelanogasteris
Soybean thrips tombus-like virus 2		Anopheles bunyavirus 1
Tama virus		Antarctic microvirus CAA_003_V_9
Tartas insect-associated virus		Apis mellifera associated partiti-like virus 1
Trichopteran jingmen-related virus		Astopletus virus
Zhee Mosquito virus		Atrato Gouko-like virus 1
		Atrato Sobemo-like virus 6
		Avian associated calicivirus 5
		Bacteriophage sp.
		Bacteroides phage B124-14
		Bat badicivirus 1
		Bat sobemovirus
		Blackfly microvirus SF02
		Brevihamaparvovirus dipteran2
		Bunyaviridae environmental sample
		Caledonia partiti-like virus
		Cane toad associated toti-like virus 2
		Cane toad associated toti-like virus 3
		Canya virus
		Caudoviricetes sp.
		Ceratobasidium partitivirus CP-h
		Chaq virus
		Conidiobolus adiaeretus totivirus 2
		Copasivirus ivindoense
		Coquillettidia bunyavirus
		Cordoba virus
		Culex Bunyavirus 2
		Culex Daeseongdong-like virus
		Culex Iflavi-like virus 1
		Culex Noda-like virus 1
		Culex Noda-like virus 2
		Culex Tetra-like virus
		Culex flavivirus
		Culex impudicus luteo-like virus
		Culex mosquito virus 6
		Culex narnavirus 1
		Culex tritaeniorhynchus flavi-like virus
		Culex vishnui subgroup totivirus
		Culex-associated Luteo-like virus
		Culex-associated Tombus-like virus
		Culicidavirus quitotaense
		Cybitervirus niederense
		Dandong tick virus 1
		Darwin bee virus 8
		Deltabaculovirus cunigripalpi
		Drosophila-associated totivirus 4
		Elemess virus
		Enontekio alphachrysovirus
		Enontekio ohlsrhavirus
		Enontekio phenui-like virus 1
		Enontekio totivirus 1
		Enontekio totivirus 2
		Ephemerovirus adelaide
		Equine hepacivirus
		Erysiphe necator associated narnavirus 48
		Erysiphe necator associated narnavirus 8
		Erysiphe necator associated sobemo-like virus 1
		Escherichia phage Ec_MI-02
		Evros sobemo-like virus
		Fako virus
		Fitzroy Crossing toti-like virus 2
		Flyfo microvirus Tbat2_156
		Fushun diaea subdola dicistro-like virus 2
		Giant panda associated gemycircularvirus
		Gokushovirinae sp.
		Gokushovirus WZ-2015a
		Grapevine-associated sobemo-like virus 1
		Grenada mosquito rhabdovirus 1
		Guadeloupe Culex rhabdovirus
		Guiyang Dicistro-like virus 2
		Guiyang Dicistro-like virus 4
		Guiyang argiope bruennichi iflavirus 1
		Guiyang dicistrovirus 3
		Hangzhou acrida cinerea lispivirus 1
		Hanko alphachrysovirus
		Hanko iflavirus 2
		Hanko sobemovirus
		Hanko totivirus 3
		Hanko totivirus 4
		Hanko totivirus 5
		Hanko totivirus 9
		Hattula totivirus 2
		Herelleviridae sp.
		Hubei mosquito virus 3
		Hubei mosquito virus 4
		Hubei tombus-like virus 20
		Hubei virga-like virus 2
		Hydrocotyle vulgaris tombusvirus
		Hypera postica associated sobemovirus 2
		Iflavirus lylineolaris
		Iflavirus sacbroodi
		Ilomantsi deltapartitivirus
		Ilomantsi partiti-like virus 1
		Ilomantsi sobemovirus
		Inhamum iflavirus
		Joensuu sobemovirus
		Joutseno totivirus
		Kacheliba Iflavi-like virus
		Kristianstad virus
		Lactuca sativa marnavirus
		Lestijarvi alphachrysovirus
		Leuven Picorna-like virus 4
		Leuven Sobemo-like virus 3
		Lotchka virus
		Marnaviridae sp.
		Merhavirus tritaeniorhynchus
		Microbacterium phage Shocker
		Microviridae sp. ctZPT1
		Mika virus
		Muscodensovirus dipteran2
		Negev virus
		Negev-like virus #174
		Neohydatothrips associated sobemo-like virus 1
		Newington virus
		Nudaurelia capensis beta virus
		Ohlsrhavirus ohlsdorf
		Osta virus
		PNG bee virus 10
		Palkane alphapartitivirus 2
		Partitivirus-like Culex mosquito virus
		Phenacoccus solenopsis virus
		Plasmopara viticola lesion associated virga-like virus 1
		Poaceae Liege totivirus 13
		Poaceae Liege totivirus 7
		Pyongtaek Culex luteo-like virus
		Pyongtaek Culex picornavirus
		Pythion sobemo-like virus
		Red panda feces-associated gemycircularvirus
		Rinkaby virus
		SI bee virus 1
		Salja virus
		Sanya Iflavirus 5
		Sanya nodavirus 1
		Sanya ochthera mantis totivirus 1
		Scaphoideus titanus sobemo-like virus 1
		Shenzhen reo-like virus 2
		Sichuan mosquito associated Iflaviridae
		Siphoviridae sp. ctbbV81
		Solenopsis invicta virus 2
		Sonnbo virus
		Soybean thrips iflavirus 8
		Soybean thrips sobemo-like virus 10
		Soybean thrips sobemo-like virus 3
		Synelinevirus bonnense
		Synelinevirus paranaense
		Tortoise microvirus 13
		Totivirus-like Culex mosquito virus 1
		Totivirus-like Culex mosquito virus 2
		Triatovirus sp.
		Tymovirus melongenae
		Tzifr virus
		Umatilla virus
		Umbelopsis ramanniana virus 4
		Ustilaginoidea virens narnavirus 1
		Uzakla mosquito-associated permutotetra-like virus
		Vaasa deltapartitivirus
		Vaasa totivirus
		Vespula vulgaris Luteo-like virus 2
		Washington bat picornavirus
		Washington bat picornavirus 2
		Wuhan Mosquito Virus 4
		Wuhan Mosquito Virus 6
		Wuhan Mosquito Virus 9
		Wuhan cricket virus 2
		Xanthi partiti-like virus
		XiangYun bunya-arena-like virus 2
		XiangYun nudi-like virus
		XiangYun toti-like virus 5
		XiangYun toti-like virus 9
		Xingshan nematode virus 6
		Zeya Brook chaq-like virus 2
		Zeya Brook partiti-like virus 1
		robinz virus RP_377
		signal crayfish associated tombus-like virus 1
